# Supplementary material for: Harnessing the Power of Health Systems and Networks for Antimicrobial Stewardship
Source: Oxford University Press journal article supplement (doi:10.1093/cid/ciac515), 2022-06-27
Supplement: ciac515_supplementary_data.zip [file ciac515_supplementary_data.zip]

Archive with 3 entries (3 files):
- Health Systems Antibiotic Stewardship Interview Guide.pdf
- Healthcare Network Questionnaire 12.17.20_final.pdf
- Networks AS_revision_suppl tables.docx
