# Supplementary material for: Harnessing the Power of Health Systems and Networks for Antimicrobial Stewardship
Source: Oxford University Press journal article supplement (doi:10.1093/cid/ciac515), 2022-06-27
Supplement: ciac515_supplementary_data.zip [file ciac515_supplementary_data.zip › Networks AS_revision_suppl tables.docx]

**Supplementary Table 1: Questionnaire Results for Metrics Utilized by Health Systems**

| **Responsibility Category** | **Responded Yes in Survey, n (%)** | **Specific metrics reported in open ended questionnaire responses** |
| --- | --- | --- |
| **What system-wide metrics does your healthcare network use to routinely evaluate (at least annually or semi-annually) the impact of a centrally coordinated antibiotic stewardship program?** | Metrics related to antibiotic use, 18 (90%) | Days of therapy per 1,000 patient days present (NHSN Antibiotic Use option),* days of therapy per % admits, days of therapy per 1,000 ED visits, standardized antimicrobial administration ratio (SAAR), tracking of antibiotic appropriateness, fluoroquinolone use for UTI, de-escalation of vancomycin, de-escalation of all antibiotics, outpatient antibiotic prescriptions per 1,000 pharmacy beneficiaries, number of doses, durations of use, restricted formulary medications, anti-infective optimization, time to appropriate therapy metrics |
| Metrics related to antibiotic resistance (please list the types of metrics used), 14 (70%) | Rates of MRSA, CRE, or VRE, annual antibiogram (local, system), NHSN Antibiotic Resistance data, *Candida auris,* rates of UTI resistance in the ED, % susceptible dose-dependent, combination antibiograms |
| Metrics related to healthcare costs (please list the types of metrics used, such as drug utilization costs), 12 (60%) | Antimicrobial charge data, laboratory stewardship costs (procalcitonin, MRSA nasal screen, etc.), antimicrobial purchasing, use and trends for high-cost drugs, total cost, cost per adjusted patient day, cost per admission, cost per infection type, monthly expenditures, Premier service line analytics, drug utilization costs, NTAP utilization, costs of biomarker driven antibiotic treatment algorithms |
| Metrics related to patient outcomes (please list the types of metrics used, such as rate of *Clostridioides difficile* infections), 14 (70%) | *Clostridioides difficile* infections, sepsis mortality, infectious disease DRG mortality, pneumonia mortality and readmissions, Hospital onset CDI rates, readmission, C. diff infection rates, central line infection rates, catheter associated UTI rates, infections for key surgeries--Hysterectomy, colorectal infections, OPAT readmissions, AKI temporal to vancomycin, length of stay |
| Other (please describe), 5 (25%) | Percentage of patients discharged on IV antibiotics who have a note written by infectious diseases, intervention acceptance rates, track appropriate usage of abx based on surgery type, track antibiotic spend per surgery, rapid diagnostics data, |

AKI: acute kidney injury; CRE: Carbapenem Resistant Enterobacterales; DRG: diagnosis-related group; ED: emergency department; IV: intravenous; MRSA: methicillin-resistant *Staphylococcus aureus*; NHSN: National Healthcare Safety Network; NTAP: ; OPAT: outpatient parenteral antimicrobial therapy; UTI: urinary tract infection;; VRE: vancomycin-resistant enterococcus

*8 (40%) organization have all hospitals reporting, 9 (45%) organization have some hospitals reporting, and 3 (15%) of no hospitals reporting to the NHSN Antibiotic Use (AU) Option

**Supplementary Table 2: Example Centralized Antimicrobial Stewardship Lead Responsibilities from Focus Groups**

| **Category** | **Subtheme** | **Example Tasks** |
| --- | --- | --- |
| Developing and implementing antibiotic stewardship policies and practices | Create and disseminate antimicrobial-stewardship related policies | Develop policies and shepherd through committees, provide education on policies, audit adherence to antimicrobial-stewardship policies (e.g., automatic MRSA nasal swab ordering in patients started on vancomycin with pneumonia, automatic ID consultation for *Staphylococcus aureus* bacteremia) |
| Create and disseminate antimicrobial stewardship guidelines | Develop and disseminate disease-specific guidelines (e.g., pneumonia, urinary tract infection), develop and disseminate antibiotic-related guidelines (e.g., dosing guidelines, antibiotic lock therapy guidelines) |
| Design and implement EHR tools and changes | Review and approve antimicrobial-related order sets and alerts, develop EHR tools (e.g., antibiotic time outs) |
| Design and implement 3rd party decision support software | Develop rules and alerts, standardize rules and expectations across sites, track impact of rules and alerts |
| Manage the antimicrobial formulary | Review antimicrobials for formulary addition, determine antimicrobial restrictions or criteria for use |
| Communication and education | Lead committee meetings | Set committee agendas, facilitate discussion at committee meetings, write and maintain a committee charter, take and/or disseminate meeting minutes |
| Present to system leaders and clinical groups | Attend and present at meetings led by key stakeholders, give Grand Rounds presentations, ensure a consistent message |
| Provide written communication to the health system | Provide email communication, write and maintain a newsletter, disseminate antimicrobial stewardship-related information through system-specific mechanisms (e.g., memos, reports, SBARs) |
| Develop and maintain and antimicrobial stewardship website | Develop an antimicrobial stewardship website, maintain website material, advertise for and monitor use of antimicrobial stewardship website |
| Design education materials | Create electronic educational modules, develop patient education handouts, develop antimicrobial stewardship-related fact sheets, create and present continuing education presentations for clinicians, maintain a webinar series |
| Development of validated data streams | Identify key antimicrobial stewardship metrics and develop data infrastructure | Create antibiograms, set antibiotic use metrics, participate in the NHSN AUR Module, evaluate guideline adherence, select clinical outcome metrics (e.g., readmission rates), streamline data collection efforts, ensure consistency in metric definitions across sites, present data for internal benchmarking |
| Develop and maintain a dashboard | Present data transparently and clearly using a dashboard, identify similar groups for direct comparison for benchmarking |
| Perform initial and annual data validation | Perform data validation, review data with key stakeholders on a regular basis to identify validation issues |
| Building and leading a stewardship community | Develop a community of antimicrobial stewards | Engage and mentor site leads, provide in-person site visits, attend local AS committee meetings, host meetings, support front-line stewards with difficult clinicians, develop a learning environment |
| Advocate for AS resources | Highlight ASPs value and return on investment, support the purchase of clinical decision support software, submit and shepherd data and technology requests |
| Facilitate alignment and build relationships with other clinical groups. | Align priorities with other clinical groups (e.g., length of stay for the hospitalists, sepsis compliance in the emergency department), collaborate on system wide initiatives led by other clinical groups |
| Provide training, mentorship and coaching | Identify struggling sites with less resources or less experience and provide 1-on-1 mentorship, mentor or coach antimicrobial stewardship personnel with high potential |
| Manage antimicrobial stewardship personnel | Hire antimicrobial stewardship personnel, manage personnel performance, complete formal evaluations, approve payroll, etc. |
| Travel to sites and conduct site visits | Conduct site visits, develop relationships by attending meetings in-person |
| Provision of subject-matter expertise | Answer clinical, patient-related questions | Field “curbside” questions regarding the diagnosis or treatment of patients with infectious diseases, provide coverage for sites without a dedicated infectious diseases pharmacist or physician |
| Lead regular conference calls for sites to access antimicrobial stewardship and infectious diseases experts | Conduct daily or weekly stewardship conference calls discussing patient cases, hold office hours for sites to access infectious diseases expertise |
| Assist with the design of antimicrobial-related changes or stewardship interventions | Review locally developed policies, procedure and guidelines, answer drug information questions from other system or network leaders |
| Strategic planning and goal setting | Assist with local goal selection | Utilize local data to identify local antimicrobial stewardship gaps |
| Strategic planning and system- or network-level goal setting | Ensure consistency and accountability across sites by assigning specific system-wide goals that may have the same target across sites or a locally tailored target, facilitate theme selection, prioritize a common annual antimicrobial stewardship theme (e.g., the year of the urine) |
| Miscellaneous activities of note | Lead or support antibiotic stewardship research | Procure grant funding for antimicrobial stewardship research, participate in national research, lead investigator-initiated research locally |
| Set the system standard to provide consistency and reduce variation | Establish a system standard of care to guide practitioners, ensure equitable care across sites, determine appropriate staffing across the system |

*Example tasks were identified by both health system participants and study authors **AS:** Antimicrobial Stewardship; **AUR:** Antibiotic Use and Resistance; **NHSN:** National Healthcare Safety Network; **SBAR:** Situation Background Assessment Recommendation
